# Supplementary material for: FRET-based fluorescence ratiometric and colorimetric sensor to discriminate Fe3+ from Fe2+
Source: Royal Society of Chemistry journal article supplement (doi:10.1039/c5nj03598h), 2016-01-01
Supplement: c5nj03598h1.pdf [file c5nj03598h1.pdf]

## Supporting Information

### **FRET based fluorescence ratiometric and colorimetric sensor to discriminate Fe<sup>3+</sup> from Fe<sup>2+</sup>**

Sangita Das<sup>a</sup>, Krishnendu Aich<sup>a</sup>, Shyamaprosad Goswami,<sup>\*a</sup> Ching Kheng Quah<sup>b</sup> and Hoong-Kun Fun<sup>b,c</sup>

<sup>a</sup> Department of Chemistry, Indian Institute of Engineering Science and Technology, Shibpur, Howrah-711 103, India. Fax: +91 33 2668 2916; Tel: +91 33 2668 2961-3; E-mail: [spgoswamical@yahoo.com](mailto:spgoswamical@yahoo.com)

<sup>b</sup>X-ray Crystallography Unit, School of Physics, Universiti Sains Malaysia, 11800 USM, Penang, Malaysia.

<sup>c</sup>Department of Pharmaceutical Chemistry, College of Pharmacy, King Saud University, Riyadh 11451, Saudi Arabia

### CONTENTS

|                                                          |  |
|----------------------------------------------------------|--|
| 1. Determination of detection limit.....                 |  |
| 2. Determination of association constant.....            |  |
| 3. X-ray crystallographic data.....                      |  |
| 4. <sup>1</sup> H NMR spectrum of Compound 1.....        |  |
| 5. <sup>13</sup> C NMR spectrum of Compound 1 .....      |  |
| 6. Mass spectrum (HRMS) of Compound 1 .....              |  |
| 7. <sup>1</sup> H NMR spectrum of RQBTE.....             |  |
| 8. <sup>13</sup> C NMR spectrum of RQBTE.....            |  |
| 9. Mass spectrum (HRMS) of RQBTE .....                   |  |
| 10. Mass spectrum (HRMS) of RQBTE-Fe <sup>3+</sup> ..... |  |

## 1. Determination of detection limit

The detection limit was calculated based on the fluorescence titration. To determine the S/N ratio, the absorbance of RQBTE without  $\text{Fe}^{3+}$  was measured by 10 times and the standard deviation of blank measurements was determined. The detection limit (DL) of **RQBTE** for  $\text{Fe}^{3+}$  was determined from the following equation:  $\text{DL} = K \times \text{Sb}_1 / S$

Where  $K = 2$  or  $3$  (we take  $3$  in this case);  $\text{Sb}_1$  is the standard deviation of the blank solution;  $S$  is the slope of the calibration curve. From the graph we get slope =  $96705.429$ , and  $\text{Sb}_1$  value is  $0.00174$ . Thus using the formula we get the Detection Limit =  $5.39 \times 10^{-8}$  M i.e. RQBTE can detect  $\text{Fe}^{3+}$  in this minimum concentration by fluorescence techniques.

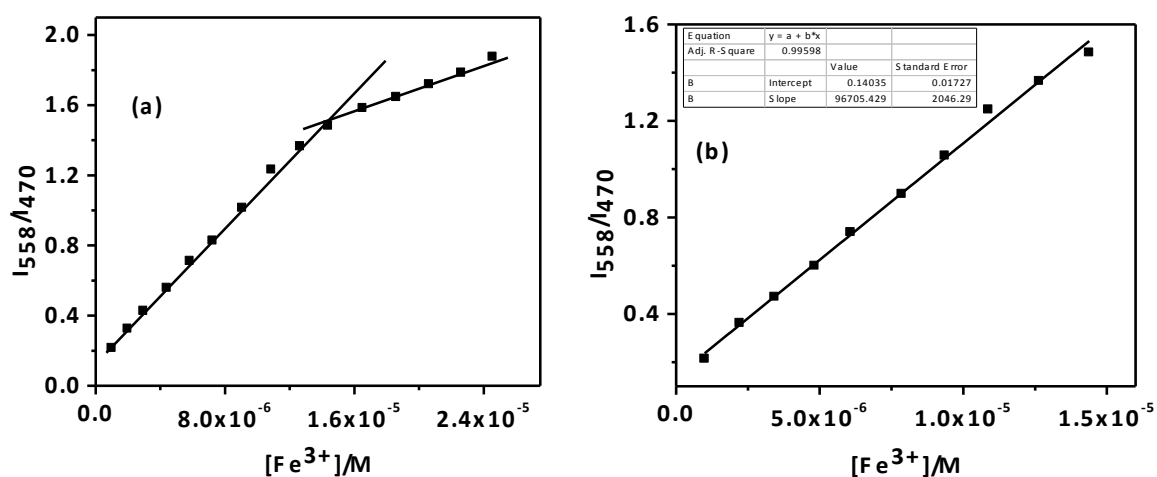

**Figure S1:** Fluorescence (a) Response and (b) only linear curve of RQBTE at fluorescence intensity ratio ( $I_{558}/I_{470}$ ) nm depending on  $\text{Fe}^{3+}$  concentration.

## Linear responsive curve of RQBTE in presence of $\text{Fe}^{3+}$

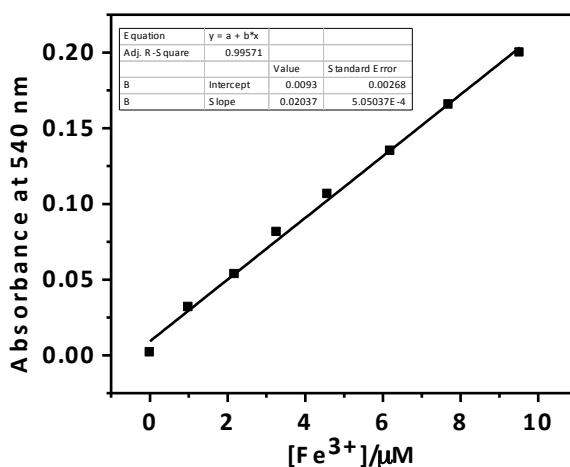

**Figure S2:** UV-vis Response curve of RQBTE at 540 nm depending on  $\text{Fe}^{3+}$  concentration.

## 2. Determination of Association Constant ( $K_a$ )

### By fluorescence method:

Association constant was calculated according to the Benesi-Hildebrand equation.  $K_a$  was calculated following the equation stated below.

$$1/(I-I_0) = 1/\{K(I_{\max}-I_0) [M^{X^+}]^n\} + 1/[I_{\max}-I_0]$$

Here  $I_0$  is the fluorescence of receptor in the absence of guest,  $I$  is the fluorescence recorded in the presence of added guest,  $I_{\max}$  is fluorescence in presence of added  $[M^{X^+}]_{\max}$  and  $K_a$  is the association constant, where  $[M^{X^+}]$  is  $[Fe^{3+}]$ . The association constant ( $K_a$ ) could be determined from the slope of the straight line of the plot of  $1/(I-I_0)$  against  $1/[Fe^{3+}]$  and is found to be  $6.12 \times 10^5 M^{-1}$ .

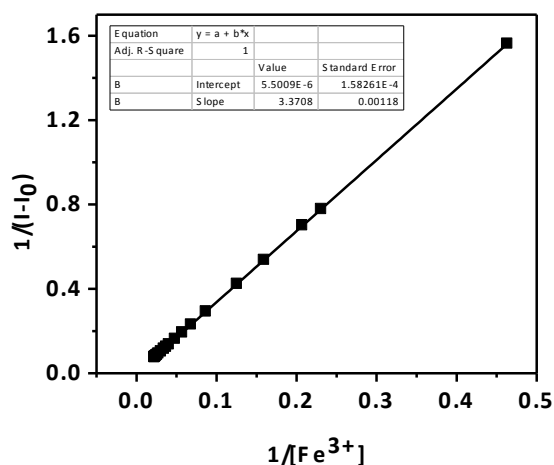

**Figure S3:** Benesi-Hildebrand plot from absorption titration data of receptor (RQBTE, 10  $\mu$ M) with  $Fe^{3+}$ .

## 3. X-ray crystallographic data

X-ray diffraction data of a single crystal of **RQBTE** (with dimensions of  $0.38 \times 0.25 \times 0.09$  mm) was collected on Bruker APEX II Duo CCD area-detector diffractometer operating at 50kV and 30mA using Mo  $K\alpha$  radiation ( $\lambda = 0.71073$  Å). Diffraction data were collected with the Oxford Cryosystem Cobra low temperature attachment at 100.0 (1) K [1]. Data collection and reduction were performed using the APEX2 and SAINT software [2]. The SADABS software was used for absorption correction [2]. **RQBTE** was solved by direct method and refinement was carried out by the full-matrix least-squares technique on  $F^2$  using SHELXTL package [3]. All non-hydrogen atoms were refined anisotropically whereas hydrogen atoms were refined isotropically. N-bound H atoms were located in the difference Fourier map and refined freely [N—H = 0.82 (2) - 0.88 (2) Å]. The remaining H atoms were placed in calculated positions with C—H = 0.95 - 0.99 Å after checking their positions in the

Fourier difference map. The  $U_{\text{iso}}$  values were constrained to be 1.2 or 1.5  $U_{\text{eq}}$  of the carrier atom. A rotating-group model was applied for the methyl groups. The crystallographic data and hydrogen bonds geometry are presented in Table S1 and S2, respectively. Crystallographic data for **RQBTE** has been deposited with the Cambridge Crystallographic Data Center No. CCDC 1416906. Copy of the data can be obtained free of charge on application to the CCDC, 12 Union Road, Cambridge CB2 IEZ, UK. Fax: +44-(0)1223-336033 or E-Mail: [deposit@ccdc.cam.ac.uk](mailto:deposit@ccdc.cam.ac.uk).

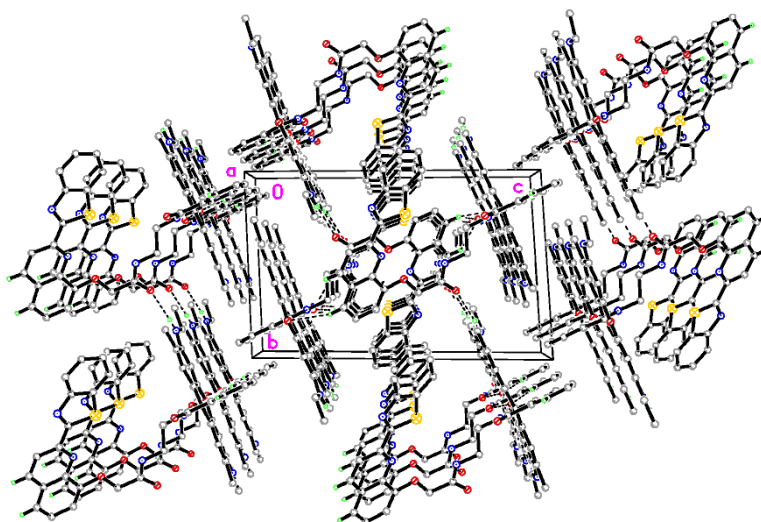

**Figure S4:** The crystal packing of **RQBTE** viewed along the  $a$ -axis and H atoms not involved in intermolecular interactions (dashed lines) have been omitted for clarity.

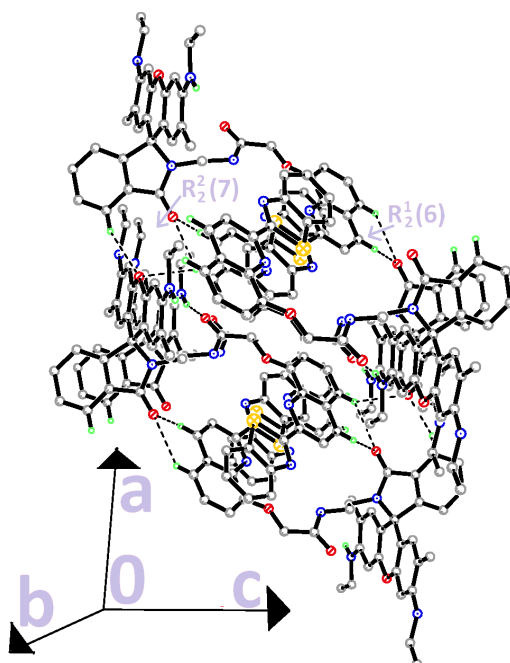

**Figure S5:** Part of the crystal packing of **RQBTE** viewed along [010], showing the  $R_2^2(7)$  and  $R_2^1(6)$  ring motifs.

**Table S1** Experimental details

|                                                                                    |                                                                  |
|------------------------------------------------------------------------------------|------------------------------------------------------------------|
| Crystal data (CCDC 1416906)                                                        |                                                                  |
| Chemical formula                                                                   | C <sub>46</sub> H <sub>42</sub> N <sub>6</sub> O <sub>4</sub> S  |
| <i>M</i> <sub>r</sub>                                                              | 774.91                                                           |
| Crystal system, space group                                                        | Triclinic, <i>P</i> $\bar{1}$                                    |
| Temperature (K)                                                                    | 100                                                              |
| <i>a</i> , <i>b</i> , <i>c</i> (Å)                                                 | 9.0642 (11), 11.8519 (14), 18.732 (2)                            |
| $\alpha$ , $\beta$ , $\gamma$ (°)                                                  | 86.072 (2), 83.458 (2), 81.905 (2)                               |
| <i>V</i> (Å <sup>3</sup> )                                                         | 1976.4 (4)                                                       |
| <i>Z</i>                                                                           | 2                                                                |
| Radiation type                                                                     | Mo <i>K</i> $\alpha$                                             |
| $\mu$ (mm <sup>-1</sup> )                                                          | 0.14                                                             |
| Crystal size (mm)                                                                  | 0.38 × 0.25 × 0.09                                               |
| Data collection                                                                    |                                                                  |
| Diffractometer                                                                     | Bruker <i>SMART APEX II</i> DUO CCD area-detector diffractometer |
| Absorption correction                                                              | Multi-scan<br>( <i>SADABS</i> ; Bruker, 2009)                    |
| <i>T</i> <sub>min</sub> , <i>T</i> <sub>max</sub>                                  | 0.950, 0.988                                                     |
| No. of measured, independent and observed [ <i>I</i> > 2σ( <i>I</i> )] reflections | 34021, 7909, 5676                                                |
| <i>R</i> <sub>int</sub>                                                            | 0.060                                                            |

|                                                                |                                                                        |
|----------------------------------------------------------------|------------------------------------------------------------------------|
| $(\sin \theta/\lambda)_{\max}$ ( $\text{\AA}^{-1}$ )           | 0.622                                                                  |
| Refinement                                                     |                                                                        |
| $R[F^2 > 2\sigma(F^2)], wR(F^2), S$                            | 0.048, 0.119, 1.02                                                     |
| No. of reflections                                             | 7909                                                                   |
| No. of parameters                                              | 530                                                                    |
| H-atom treatment                                               | H atoms treated by a mixture of independent and constrained refinement |
| $\Delta\rho_{\max}, \Delta\rho_{\min}$ ( $e \text{\AA}^{-3}$ ) | 0.31, -0.33                                                            |

**Table S2** Hydrogen-bond geometry ( $\text{\AA}, ^\circ$ )

| $D-H\cdots A$             | $D-H$    | $H\cdots A$ | $D\cdots A$ | $D-H\cdots A$ |
|---------------------------|----------|-------------|-------------|---------------|
| $N5-H1N5\cdots O3^i$      | 0.86 (2) | 2.16 (2)    | 2.988 (2)   | 161 (2)       |
| $C18-H18A\cdots O1^{ii}$  | 0.95     | 2.53        | 3.418 (2)   | 157           |
| $C28-H28A\cdots O1^{iii}$ | 0.95     | 2.60        | 3.384 (3)   | 141           |
| $C28-H28A\cdots O2^{iv}$  | 0.95     | 2.59        | 3.358 (3)   | 138           |
| $C30-H30A\cdots O2^{iv}$  | 0.95     | 2.37        | 3.190 (3)   | 144           |
| $C16-H16A\cdots Cg1^v$    | 0.95     | 2.55        | 3.486 (2)   | 168           |
| $C46-H46C\cdots Cg2^{vi}$ | 0.98     | 2.84        | 3.483 (2)   | 124           |

Symmetry codes: (i)  $x, y+1, z$ ; (ii)  $x-1, y, z$ ; (iii)  $-x+1, -y+1, -z+1$ ; (iv)  $-x, -y+1, -z+1$ ; (v)  $-x+1, -y+2, -z$ ; (vi)  $-x+1, -y+1, -z$ .

\* Cg 1 and Cg2 are the centroids for C1—C6 and C14—C19 benzene rings, respectively.

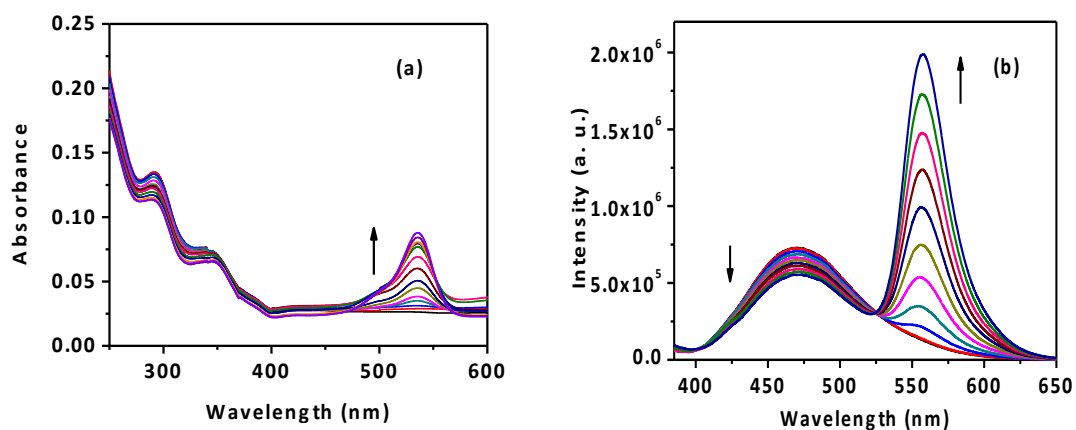

**Figure S6:** (a) The UV-vis spectra and (b) fluorescence spectra of RQBTE (10 μM, MeOH/H<sub>2</sub>O, 1/4, pH=7.2) in presence of Fe<sup>3+</sup> (0-2.5 equivalents in water).

#### 4. <sup>1</sup>H NMR spectrum of compound 1

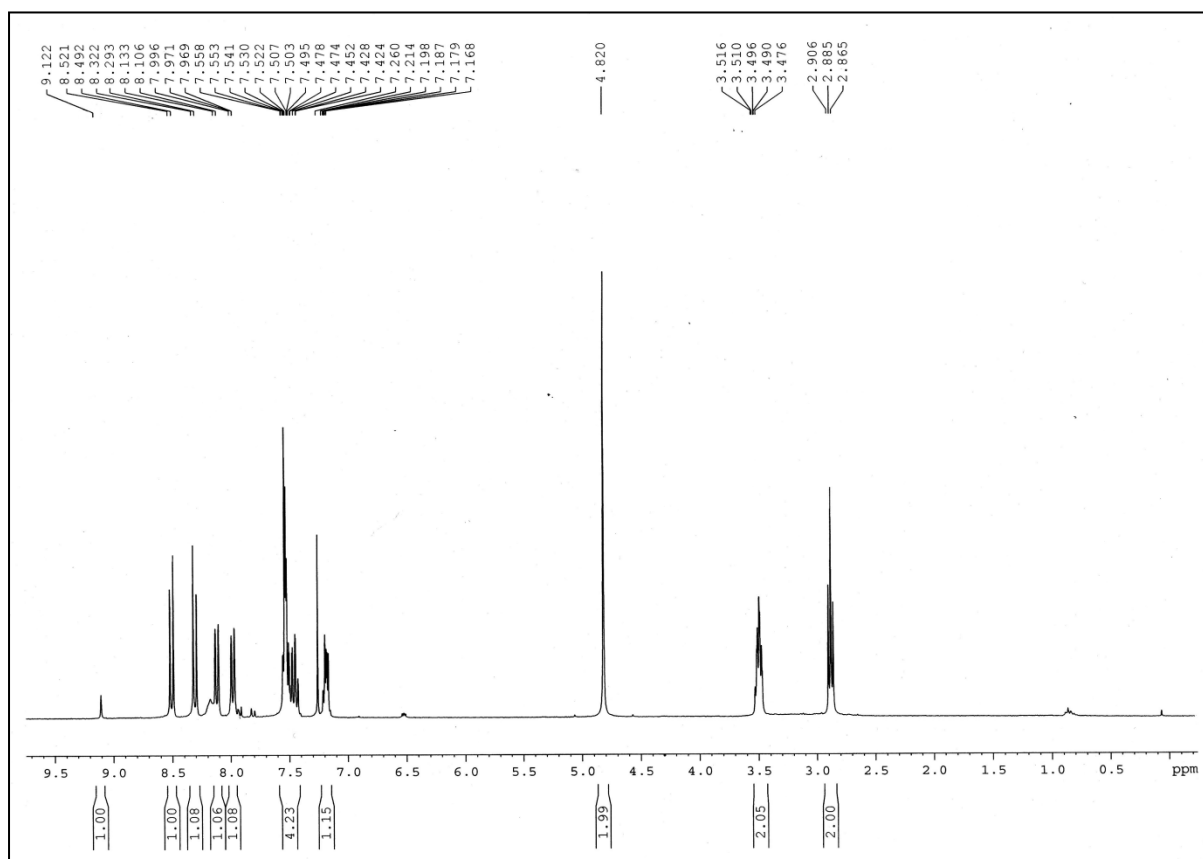

**Figure S7:** <sup>1</sup>H NMR (300 MHz) spectra of compound 1 in CDCl<sub>3</sub>.

## 5. $^{13}\text{C}$ NMR spectrum of compound 1

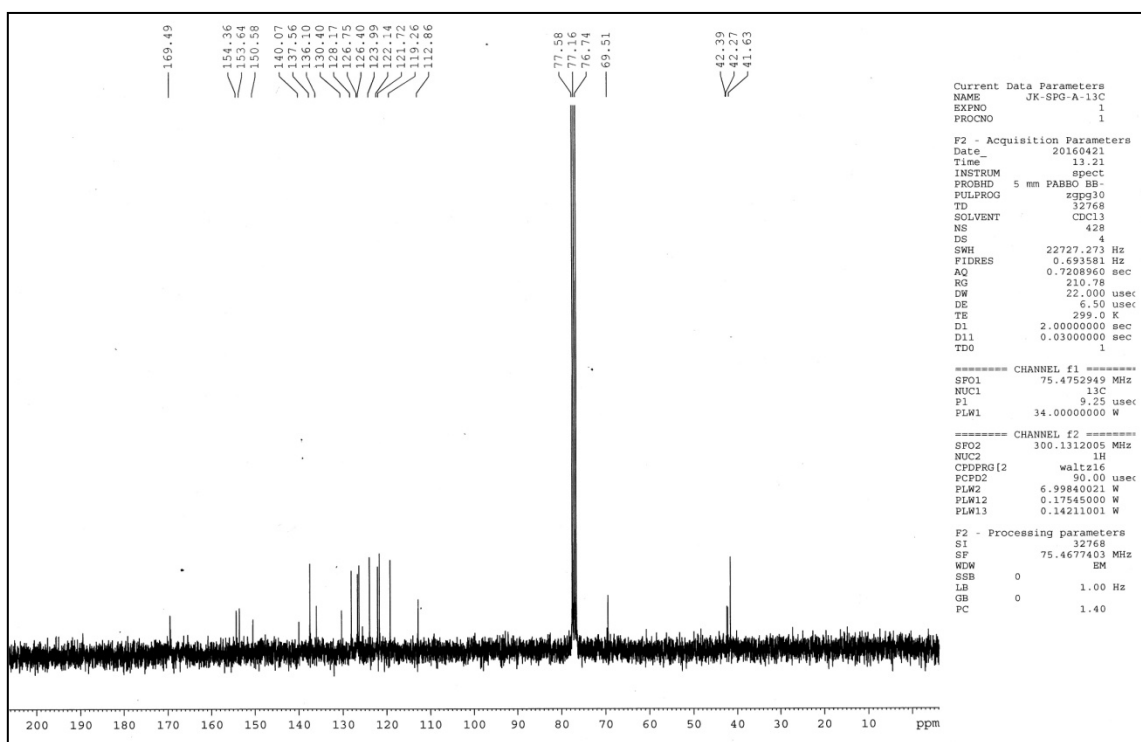

Figure S8:  $^{13}\text{C}$  NMR (75 MHz) spectra of compound 1 in  $\text{CDCl}_3$ .

## 6. Mass spectrum (HRMS) of Compound 1

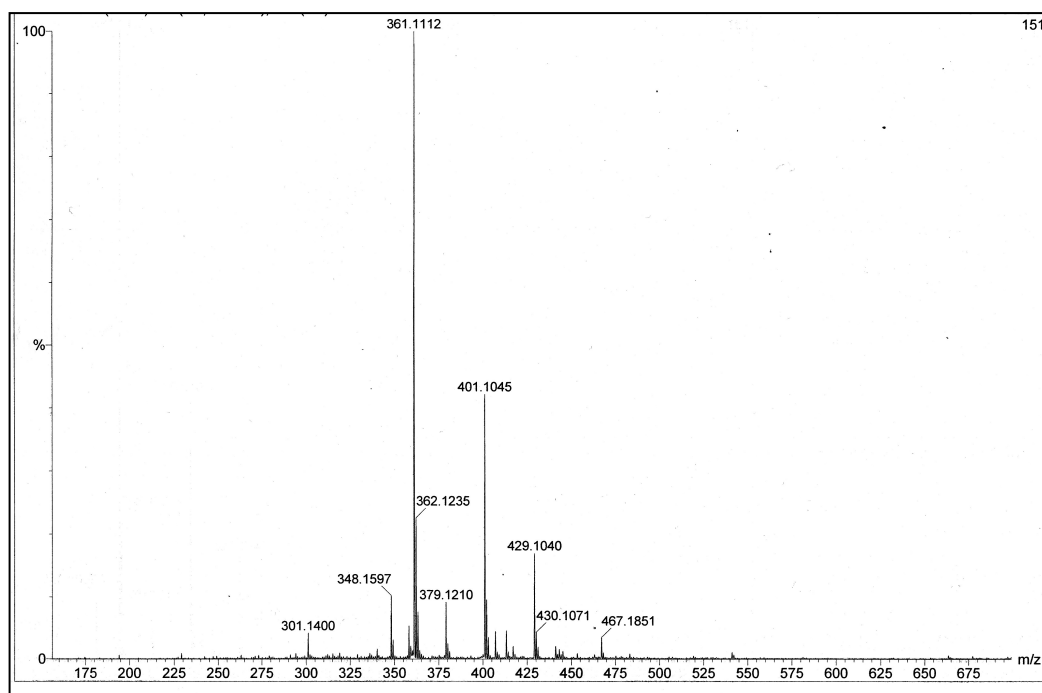

Figure S9: HRMS of compound 1.



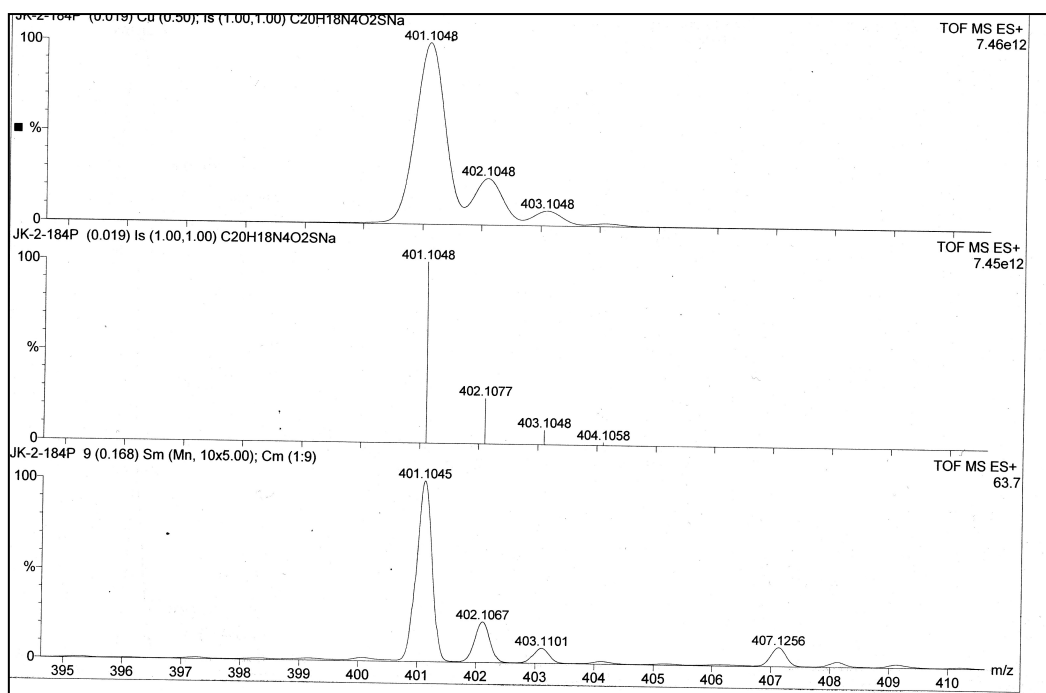

**Figure S10:** HRMS (expansion) of compound 1.

7.  $^1\text{H}$  NMR (300 MHz) of RQBTE:

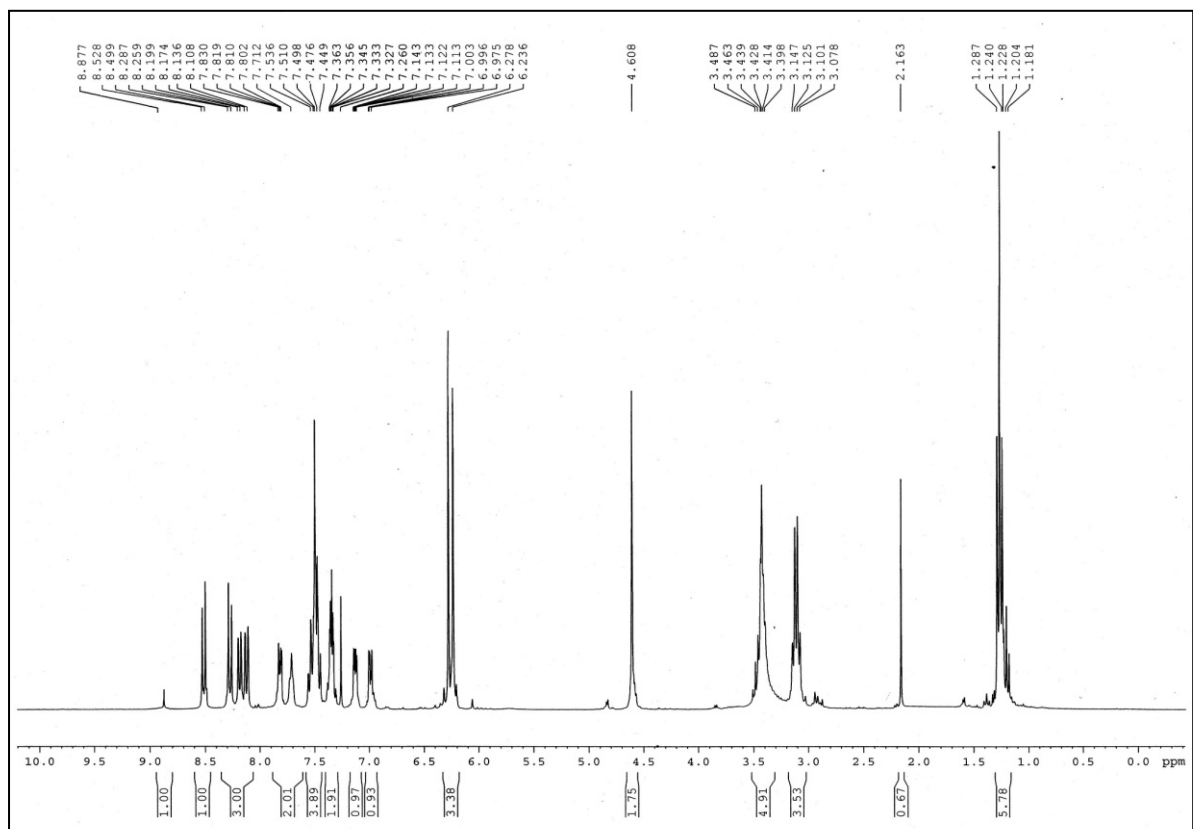

**Figure S11:**  $^1\text{H}$  NMR (300 MHz) spectrum of RQBTE in  $\text{CDCl}_3$ .

## 8. $^{13}\text{C}$ NMR spectrum of RQBTE

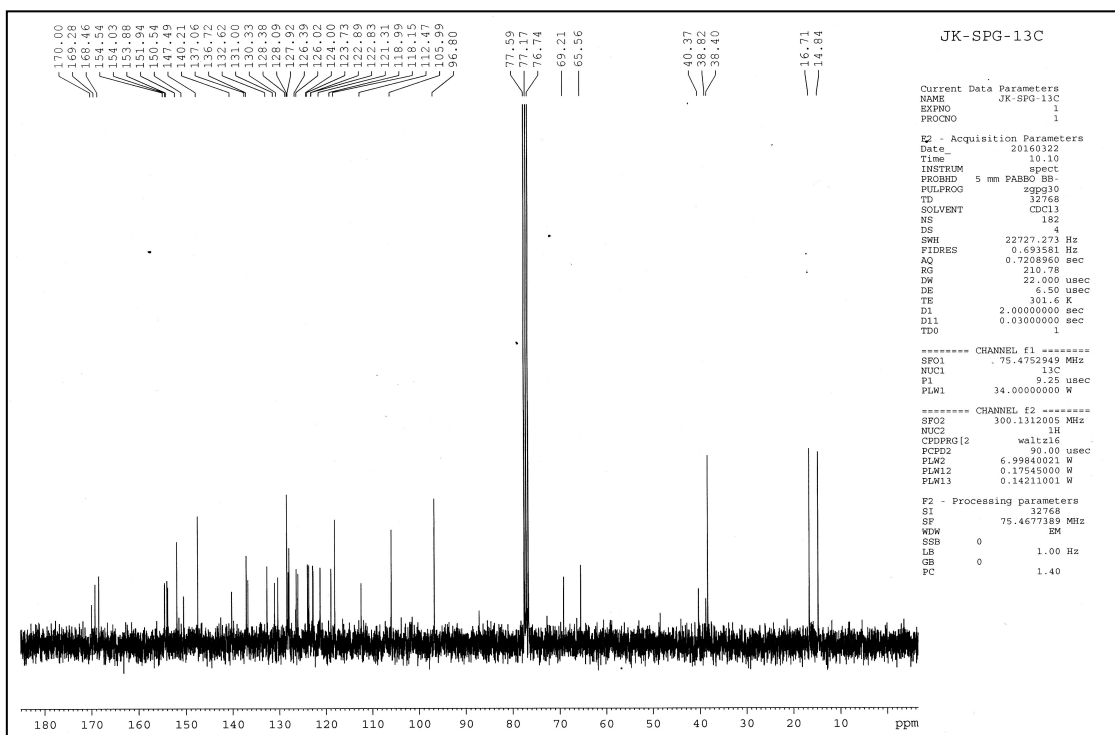

Figure S12:  $^{13}\text{C}$  NMR (75 MHz) spectra of the receptor (RQBTE) in  $\text{CDCl}_3$ .

## 9. Mass spectrum (HRMS) of RQBTE

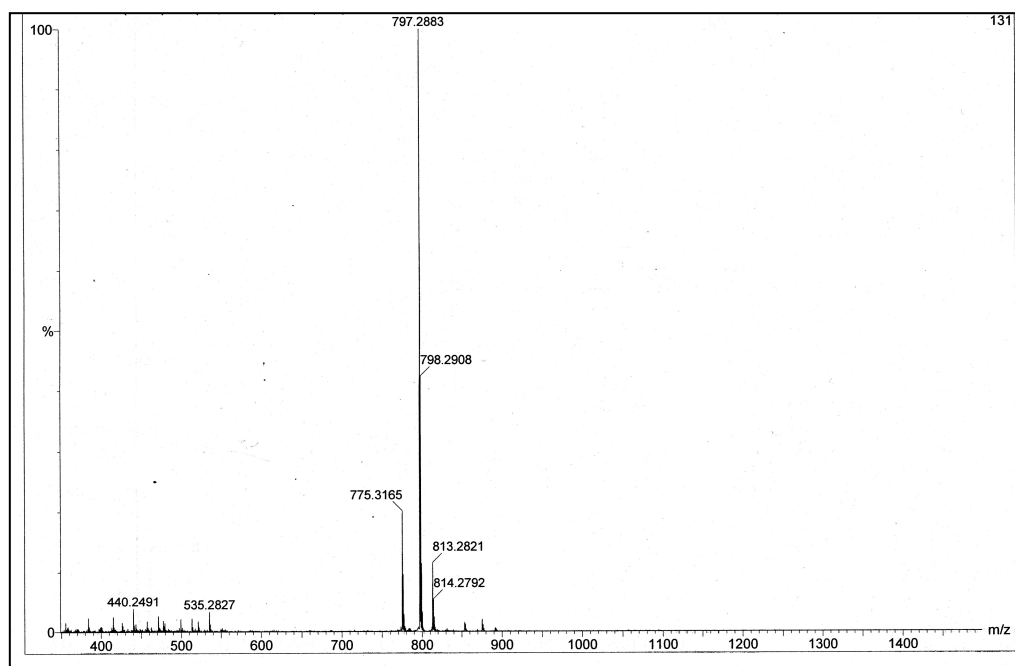

Figure S13: HRMS of RQBTE

## 10. HRMS of RQBTE-Fe<sup>3+</sup> complex.

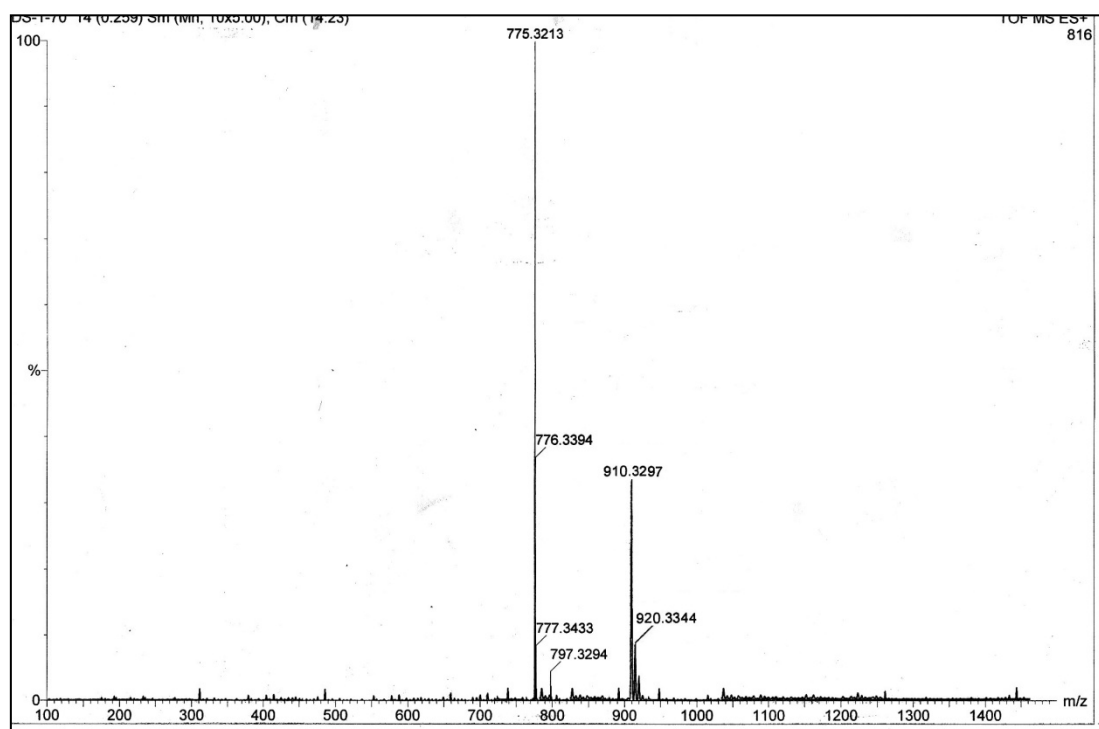

**Figure S14:** HRMS spectra of RQBTE-Fe<sup>3+</sup> complex.

Table S3: The comparison of the present probe with recently reported probes for Fe<sup>3+</sup> have been outlined in this table.

| Fluorophore used                                    | Type of response           | Nature of enhancement | Detection limit                          | Reference                                    |
|-----------------------------------------------------|----------------------------|-----------------------|------------------------------------------|----------------------------------------------|
| Anthracene                                          | Colorimetric, fluorometric | Turn-on               | $5.8 \times 10^{-7}$ M                   | <i>Chem. Commun.</i> , 2014, 50, 4631        |
| Rhodamine-6G and 6-(hydroxymethyl)picolinohydrazide | Colorimetric, fluorometric | Turn-on               | $3.6 \times 10^{-8}$ M                   | <i>Dalton Trans.</i> , 2013, 42, 15113       |
| 8-piperazino naphthalimide-rhodamine B              | Colorimetric, Fluorometric | Ratiometric           | $5 \times 10^{-8}$ M                     | <i>Analyst</i> , 2013, 138,1334.             |
| Fluoranthene                                        | Colorimetric, fluorometric | Turn-on               | $2.49 \times 10^{-7}$ M                  | <i>Dyes and Pigments</i> , 2012, 94, 60      |
| Rhodamine B, 8-Aminoquinoline and 2-aminopyridine   | Colorimetric, fluorometric | Turn -on              | $3.5 \times 10^{-6}$ M                   | <i>Dalton Trans.</i> , 2014, 43, 5983        |
| Anthracene-benzimidazole                            | fluorometric               | Ratiometric           | Not given                                | <i>Tetrahedron Letters</i> , 2011, 52, 1368. |
| Aminoxy-linked rhodamine hydroxamate                | Colorimetric, fluorometric | Turn-on               | Not given                                | <i>Tetrahedron Letters</i> , 2010, 51, 3290. |
| 4-(diethylamino) benzaldehyde-pyridine              | Colorimetric, fluorometric | Ratiometric           | $5.8 \times 10^{-8}$ M                   | <i>Dalton Trans.</i> , 2013, 42, 13889       |
| 4-(4-hydroxy-1-naphthylazo)benzenesulfonic acid     | Colorimetric               | -                     | $4.2 \times 10^{-9}$ mol L <sup>-1</sup> | <i>RSC Adv.</i> , 2014,4, 19370-19374        |
| 8-quinolinol- Rhodamine 6G hydrazide                | Colorimetric, fluorometric | Ratiometric           | Not given                                | <i>Org. Biomol. Chem.</i> , 2012, 10, 9634.  |
| Thiacalix[4]arene                                   | Colorimetric, fluorometric | Turn-off              | $5 \times 10^{-7}$ M                     | <i>Dalton Trans.</i> , 2012, 41, 408.        |
| Benzothiazole -quinoline - rhodamine-6G             | Colorimetric, fluorometric | Ratiometric           | $5.39 \times 10^{-8}$ M                  | Present Work                                 |

## References

1. Cosier, J.; Glazer, A. M. A nitrogen-gas-stream cryostat for general X-ray diffraction studies. *J. Appl. Cryst.* 1986, 19, 105–107.
2. Bruker. APEX2, SAINT and SADABS. Bruker AXS Inc.: Madison, WI, USA, 2009.
3. Sheldrick, G.M. A short history of SHELX. *Acta Cryst.* 2008, A64, 112-122.
